# Supplementary material for: Chiral 2,6-lutidinyl-biscarbene complexes of palladium
Source: Royal Society of Chemistry journal article supplement (doi:10.1039/b103330c), 2001-01-01
Supplement: b103330ct.doc [file b103330ct.doc]

**Table S1** Representative results of the Heck reaction

|  | | | |  |  |  | |  |  |  |
| --- | --- | --- | --- | --- | --- | --- | --- | --- | --- | --- |
| Aryl Halide*a* | Catalyst | Catalyst  (mol %) | TON*b* | |  | | | |
| 4-CH3CO-C6H4Br | **1a** | 7 x 10-5 | 714500 | |  | | | |
| 4-CH3CO-C6H4Br | **1a** | 7 x 10-3 | 14290 | |  | | | |
| 4-CH3CO-C6H4Br | **1b** | 7 x 10-5 | 1429000 | |  | | | |
| 4-CH3CO-C6H4Br | **1b** | 7 x 10-3 | 14290 | |  | | | |
| 4-CH3CO-C6H4Br | **2a** | 7 x 10-5 | 714500 | |  | | | |
| 4-CH3CO-C6H4Br | **2a** | 7 x 10-3 | 14290 | |  | | | |
| C6H5Br | **1a** | 7 x 10-5 | 185770 | |  | | | |
| C6H5Br | **1b** | 7 x 10-5 | 685920 | |  | | | |
| 4-CH3CO-C6H4Cl | **1a** | 7 x 10-3 | 470 | |  | | | |
| 4-CH3CO-C6H4Cl | **1b** | 7 x 10-3 | 630 | |  | | | |
| C6H5I | **1b***c* | 7 x 10-5 | 257220 | |  | | | |
| 4-CH3CO-C6H4Br | **1a***c* | 7 x 10-3 | 860 | |  | | | |
| 4-CH3CO-C6H4Br | **1b***c* | 7 x 10-3 | 1220 | |  | | | |
| Reaction time 18 hours at 140oC. *a*Amounts: ArX, 5mmol; methyl acrylate, 6 mmol; NEt3, 7 mmol; *N*-methyl pyrrolidone was used as solvent. *b* Determined by GC, based on the product using di(ethylene glycol) diethyl ether as GC standard. *c* Reaction temperature 80oC | | | | |  | | | |
